# Supplementary material for: Insights into the three-dimensional Lagrangian geometry of the Antarctic polar vortex
Source: Copernicus journal article supplement (doi:10.5194/npg-24-379-2017), 2017-07-25
Supplement: Supplementary file [file npg-24-379-2017-supplement-title-page.pdf › npg-24-379-2017-supplement-title-page.pdf]

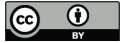

*Supplement of*

## **Insights into the three-dimensional Lagrangian geometry of the Antarctic polar vortex**

**Jezabel Curbelo et al.**

*Correspondence to:* Ana Maria Mancho (a.m.mancho@icmat.es)

- [npg-24-379-2017-supplement-title-page.pdf](#)
- [movie\\_S1.avi](#)

The copyright of individual parts of the supplement might differ from the CC BY 3.0 License.
